# Supplementary material for: Return to the Ross Ice Shelf Project (RISP), Site J-9 (1977–1979): perspectives of West Antarctic Ice Sheet history from Miocene and Holocene benthic foraminifera
Source: Copernicus journal article supplement (doi:10.5194/jm-43-187-2024), 2024-07-01
Supplement: Supplementary file 1 [file jm-43-187-2024-supplement.pdf]

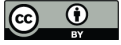

*Supplement of*

**Return to the Ross Ice Shelf Project (RISP), Site J-9 (1977–1979):  
perspectives of West Antarctic Ice Sheet history from Miocene and Holocene  
benthic foraminifera**

**Serena N. Dameron et al.**

*Correspondence to:* Serena N. Dameron ([sdameron@umass.edu](mailto:sdameron@umass.edu))

The copyright of individual parts of the supplement might differ from the article licence.

Table 10. Description of components of GDP by 4

| Year | Sector | Sub-sector | Description | Employment | Value added | GDP         | Sectoral breakdown |                 |                   |                     |                       |                         |                           |                             |                               |                                 | Total |
|------|--------|------------|-------------|------------|-------------|-------------|--------------------|-----------------|-------------------|---------------------|-----------------------|-------------------------|---------------------------|-----------------------------|-------------------------------|---------------------------------|-------|
|      |        |            |             |            |             |             | 1                  | 2               | 3                 | 4                   | 5                     | 6                       | 7                         | 8                           | 9                             | 10                              |       |
| 2000 | 1      | 1.1        | 1.1.1       | 1.1.1.1    | 1.1.1.1.1   | 1.1.1.1.1.1 | 1.1.1.1.1.1.1      | 1.1.1.1.1.1.1.1 | 1.1.1.1.1.1.1.1.1 | 1.1.1.1.1.1.1.1.1.1 | 1.1.1.1.1.1.1.1.1.1.1 | 1.1.1.1.1.1.1.1.1.1.1.1 | 1.1.1.1.1.1.1.1.1.1.1.1.1 | 1.1.1.1.1.1.1.1.1.1.1.1.1.1 | 1.1.1.1.1.1.1.1.1.1.1.1.1.1.1 | 1.1.1.1.1.1.1.1.1.1.1.1.1.1.1.1 |       |
